# Supplementary material for: The NMD Pathway Regulates GABARAPL1 mRNA during the EMT
Source: MDPI journal article supplement (doi:10.3390/biomedicines9101302), 2021-09-23
Supplement: s1 [file s1]

# Supplementary files

## The NMD pathway differentially regulates ATG8 mRNAs during EMT

**Timothée Baudu <sup>1</sup>, Chloé Parratte <sup>1</sup>, Valérie Perez <sup>1</sup>, Anne Peigney <sup>1,5</sup>, Paul Peixoto <sup>1,5</sup>, Eric Hervouet <sup>1,4,5</sup>, Marie Ancion <sup>2</sup>, Michael Herfs <sup>2</sup>, Stefania Millevoi <sup>3</sup>, Annick Fraichard <sup>1</sup>, Michael Guittaut <sup>1,4</sup> and Aurélie Baguet <sup>1,4,\*</sup>**

<sup>1</sup> Univ. Bourgogne Franche-Comté, INSERM, EFS BFC, UMR1098, RIGHT Institute, Interactions Hôte-Greffon-Tumeur/Ingénierie Cellulaire et Génique, F-25000 Besançon, France.

<sup>2</sup> Laboratory of Experimental Pathology, GIGA-Cancer, University of Liege, B-4000 Liege, Belgium.

<sup>3</sup> Cancer Research Centre of Toulouse, INSERM UMR 1037, Université Toulouse III - Paul Sabatier, 31330 Toulouse, France.

<sup>4</sup> DIImaCell platform, Univ. Bourgogne Franche-Comté, F-25000 Besançon, France.

<sup>5</sup> EPIGENEXP platform, Univ. Bourgogne Franche-Comté, F-25000 Besançon, France.

\* Correspondence: [aurelie.baguet@univ-fcomte.fr](mailto:aurelie.baguet@univ-fcomte.fr)

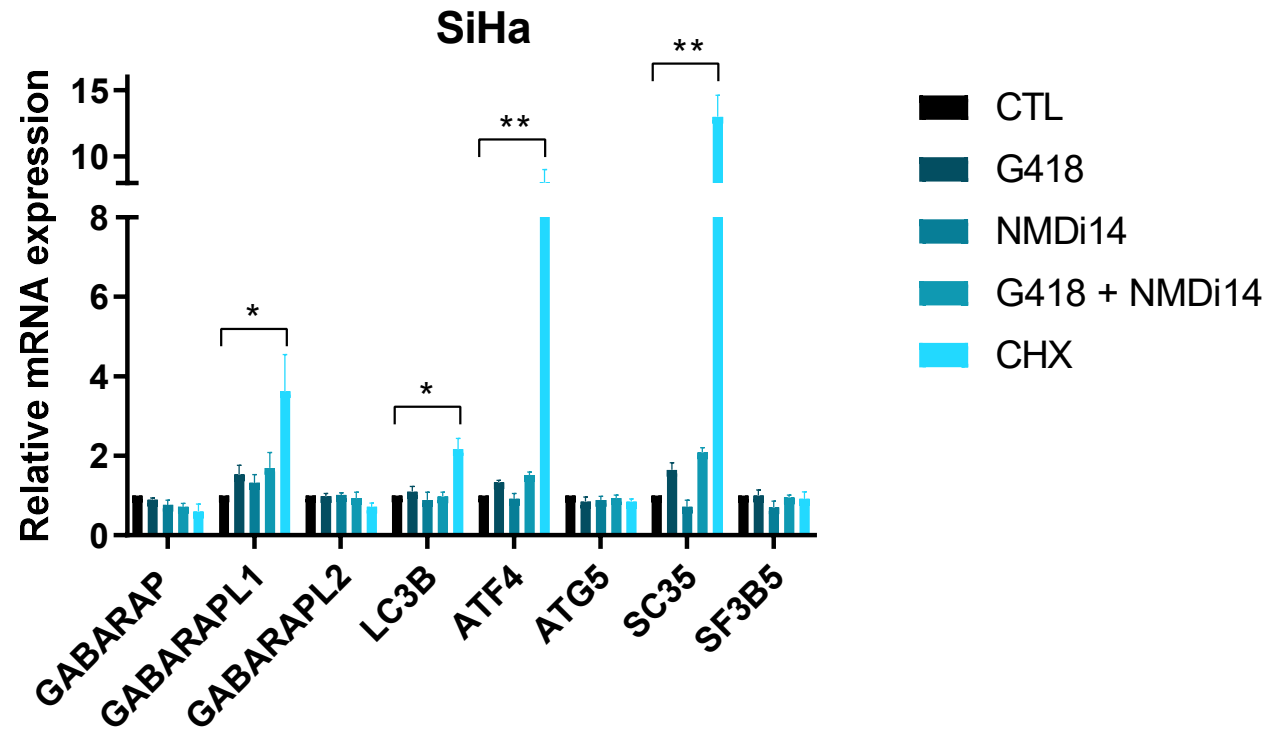

**Figure S1. Regulation of the ATG8 family mRNA expression upon chemical inhibition of the NMD.** SiHa cells have been treated with G418 (400  $\mu\text{g/ml}$ ) or NMDi14 (50  $\mu\text{M}$ ) for 24 h, or with CHX (100  $\mu\text{g/ml}$ ) for 5 h, and the expression levels of ATG8 mRNAs have been analyzed by RT-qPCR. The values were calculated using the  $\Delta\Delta\text{CT}$  method and were relative to H3B2 levels and expressed as fold change. Data are represented as  $\pm\text{S.E.M}$  of three independent experiments. P-values were calculated using Student's t test.

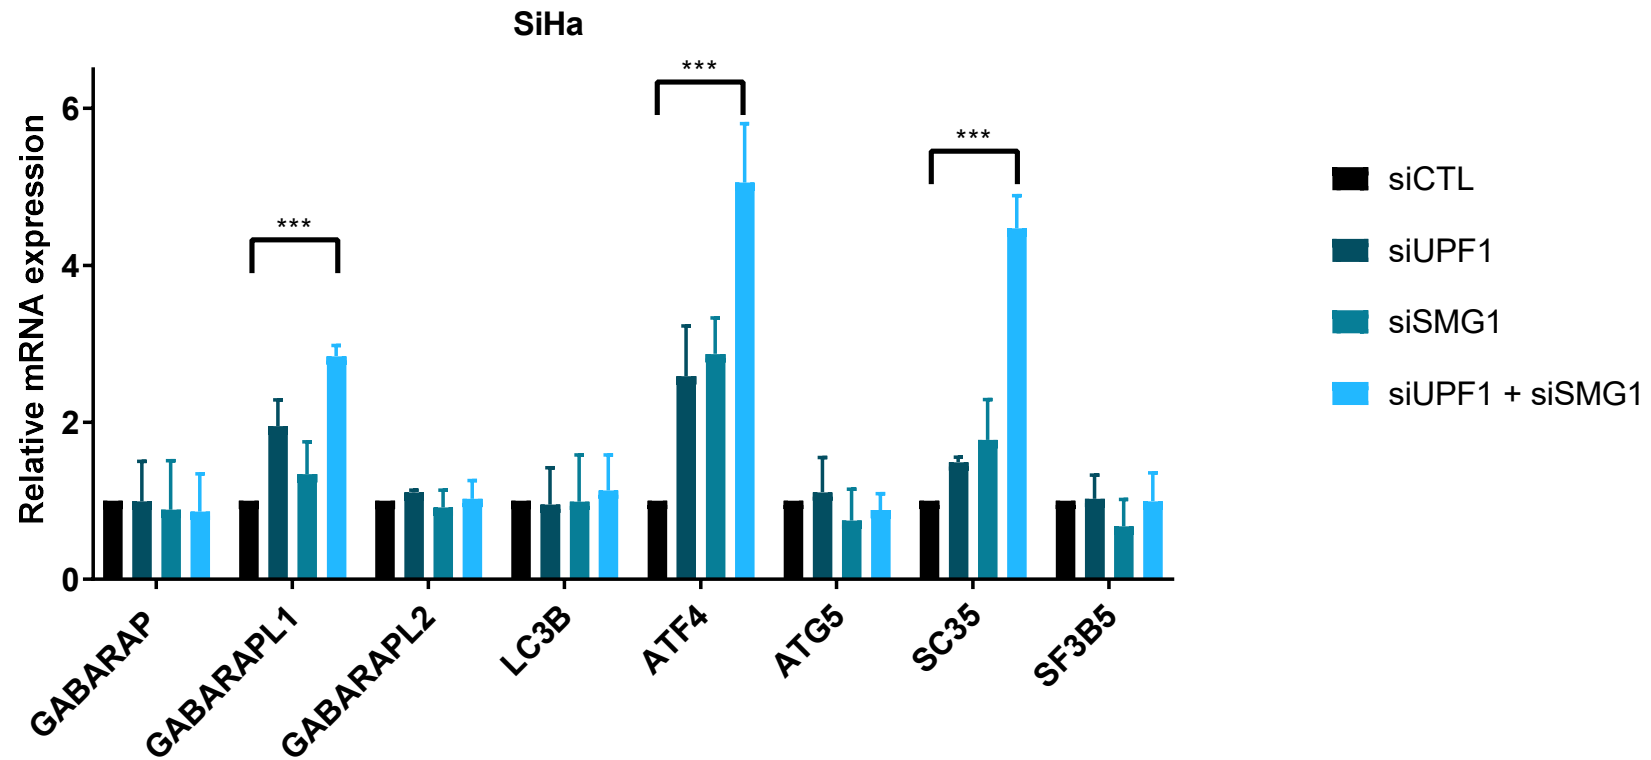

**Figure S2. Regulation of the ATG8 family mRNAs expression upon siRNA-mediated inhibition of the NMD.** SiHa cells have been transfected with siRNA (20 pmol/well) targeting NMD transcripts UPF1 or SMG1. Quantification by RT-qPCR of ATG8 transcripts expression levels. The values were calculated using the  $\Delta\Delta CT$  method and were normalized to H3B2 levels and expressed as fold changes. Data are represented as  $\pm$  S.E.M of three independent experiments. P-values were calculated using a Student's *t* test.

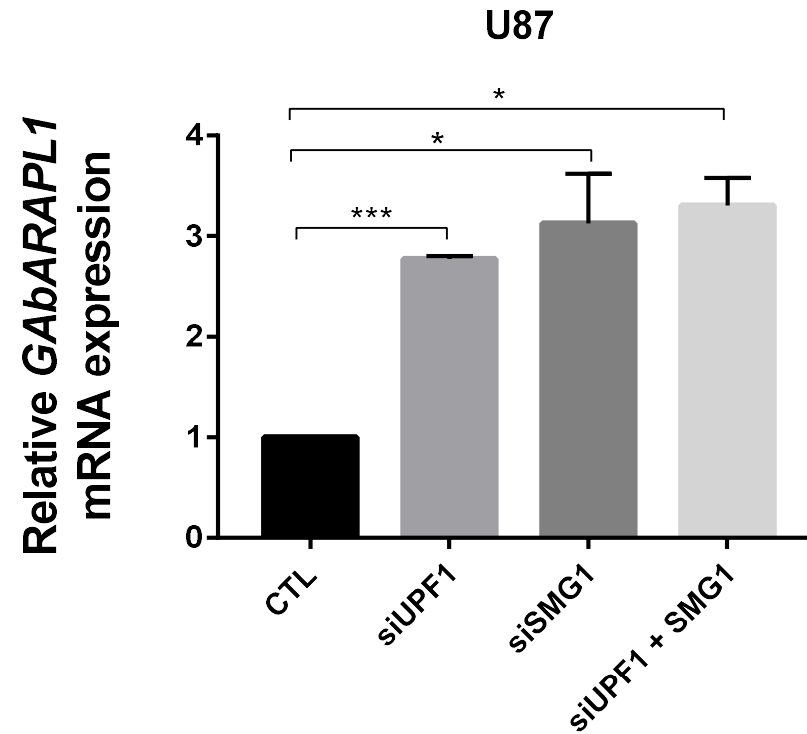

**Figure S3. Regulation of the GABARAPL1 mRNA expression upon siRNA-mediated inhibition of the NMD.** U87 cells have been transfected with siRNA (20 pmol/well) targeting NMD transcripts UPF1 or SMG1. Quantification by RT-qPCR of GABARAPL1 transcripts expression levels. The values were calculated using the  $\Delta\Delta CT$  method and were normalized to H3B2 levels and expressed as fold changes. Data are represented as  $\pm$  S.E.M of three independent experiments. P-values were calculated using a Student's *t* test.

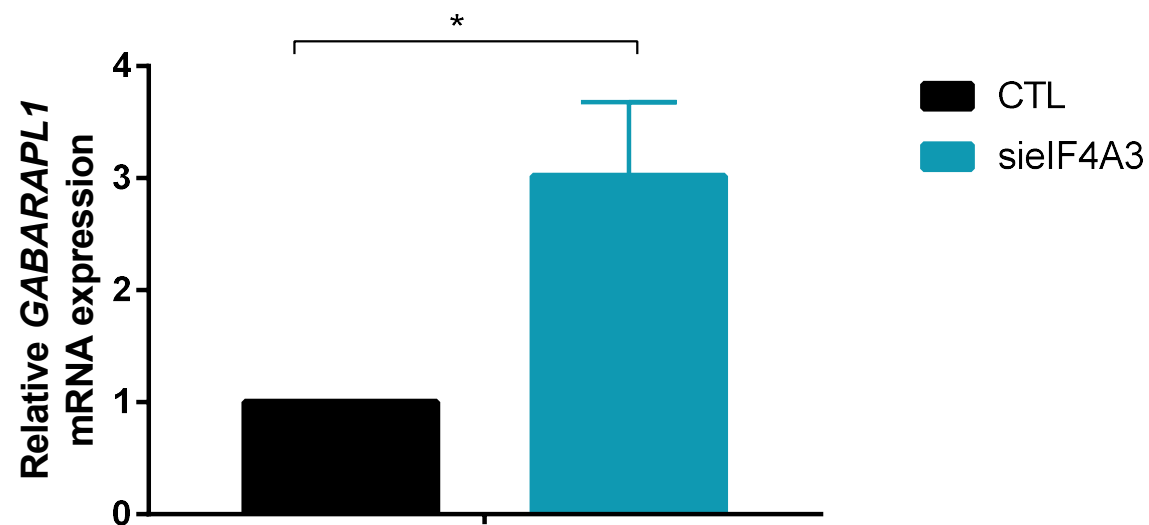

**Figure S4. Regulation of the GABARAPL1 mRNA levels upon siRNA-mediated inhibition of eIF4A3.** SiHa cells have been transfected with siRNA (20 pmol/well) targeting eIF4A3. Quantification by RT-qPCR of expression levels of GABARAPL1 transcripts. The values were calculated using the  $\Delta\Delta CT$  method and were normalized to H3B2 levels and expressed as fold changes. Data are represented as  $\pm$ S.E.M of three independent experiments. P-values were calculated using a Student's *t* test.
